# Supplementary material for: Azo doped polymer thin films for active and passive optical power limiting applications
Source: Royal Society of Chemistry journal article supplement (doi:10.1039/c3pp50065a), 2013-05-14

## Supplementary material

### Azo doped polymer thin films for active and passive optical power limiting applications †

B. Rajashekar,<sup>a</sup> Sagar Limbu,<sup>a</sup> Kamarusu Aditya,<sup>a</sup> G. Nageswara Rao<sup>b</sup> and S. Siva Sankara Sai<sup>a\*</sup>

<sup>a</sup>Department of Physics, Sri Sathya Sai Institute of Higher Learning, Prashanti Nilayam, Andhra Pradesh, 515134 India.

Email: [sivasankarasai@sssihl.edu.in](mailto:sivasankarasai@sssihl.edu.in).

Tel: +919440826406

<sup>b</sup>Department of Chemistry, Sri Sathya Sai Institute of Higher Learning, Prashanti Nilayam, Andhra Pradesh, 515134 India.

Email: [gnageswararao@sssihl.edu.in](mailto:gnageswararao@sssihl.edu.in)

Tel: +91949295462

#### Structural determination by <sup>1</sup>H-NMR, <sup>13</sup>C-NMR and Mass spectroscopic techniques

| S.No. | Compound name | <sup>1</sup> H-NMR (δ)                                                                                                                                                                                                                                                                                                                                       | <sup>13</sup> C-NMR (δ)                                                                                                                                                                                                                              | M.S data (m/z)                                                                                                                                                                                                                                                                            |
|-------|---------------|--------------------------------------------------------------------------------------------------------------------------------------------------------------------------------------------------------------------------------------------------------------------------------------------------------------------------------------------------------------|------------------------------------------------------------------------------------------------------------------------------------------------------------------------------------------------------------------------------------------------------|-------------------------------------------------------------------------------------------------------------------------------------------------------------------------------------------------------------------------------------------------------------------------------------------|
| 1)    | E4PA          | 1.23 (3H, t, H-8, J=7.2 Hz)<br>1.6 (1H, unresolved, -OH)<br>3.54 (2H, q, H-7, J=7.2 Hz)<br>3.59 (2H, t, H-5, J=6.6 Hz)<br>3.82 (2H, d, H-6, J=6.6 Hz)<br>6.79 (1H, d, H-4, J=9 Hz)<br>7.37 (1H, triplet of a triplet, H-9, J=2.07Hz)<br>7.47 (2H, triplet, H-1, J=7.2 Hz)<br>7.82 (2H, doublet of doublet, H-2, J=7.2 Hz)<br>7.85 (2H, doublet, H-3, J=9 Hz) | 12.19, 1C (C-8)<br>45.96, 1C (C-7)<br>52.526, 1C (C-5)<br>60.376, 1C (C-6)<br>111.71, 2C (C-4)<br>122.329, 2C (C-1)<br>125.310, 2C (C-3)<br>129.088, 2C (C-2)<br>129.568, 1C (C-9)<br>143.791, 1C (C-12)<br>150.647, 1C (C-11)<br>153.421, 1C (C-10) | 269 (M) <sup>+</sup><br>238 (M - CH <sub>2</sub> OH) <sup>+</sup><br>164 (238 - Ph-N <sub>2</sub> ) <sup>+</sup><br>105 (Ph-N <sub>2</sub> ) <sup>+</sup><br>77 (C <sub>6</sub> H <sub>5</sub> ) <sup>+</sup>                                                                             |
| 2)    | E4TPA         | 1.251 (3H, t, H-8, J=7.2 Hz)<br>1.601 (1H, t, OH, J=5.6 Hz)<br>3.547 (2H, q, H-7, J=7.2 Hz)<br>3.609 (2H, q, H-5, J=6 Hz)<br>3.881 (2H, q, H-6, J=6 Hz)<br>6.80 (2H, d, H-4, J=9 Hz)<br>7.72 (d, 2H, H-2, J=8.4 5Hz)<br>7.88 (d, 2H, H-3, J=9 Hz)<br>7.90, (d, 2H, H-1, J=8.4 Hz)                                                                            | 12.08, 1C (C-8)<br>46, 1C (C-7)<br>52.412, 1C (C-5)<br>60.33, 1C (C-6)<br>111.5, 2C (C-4)<br>122.32, 4C (C-2, C-3)<br>125.5, 2C (C-1)<br>126, 1C (C-9)                                                                                               | 337 (M) <sup>+</sup><br>306 (M - CH <sub>2</sub> OH) <sup>+</sup><br>164 (M - Ph-(C <sub>2</sub> H <sub>5</sub> )(C <sub>2</sub> H <sub>4</sub> OH)) <sup>+</sup><br>133 (306 - CF <sub>3</sub> -Ph-N=N) <sup>+</sup><br>105 (C <sub>6</sub> H <sub>4</sub> N <sub>2</sub> ) <sup>+</sup> |

### E4PA

#### <sup>1</sup>H NMR

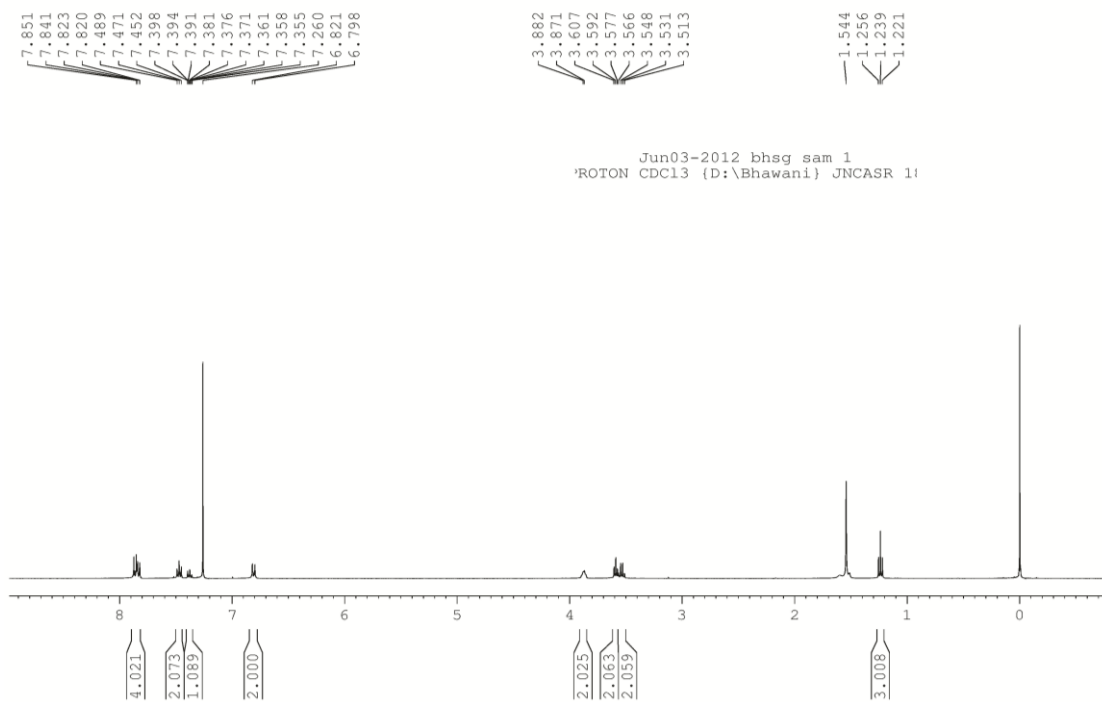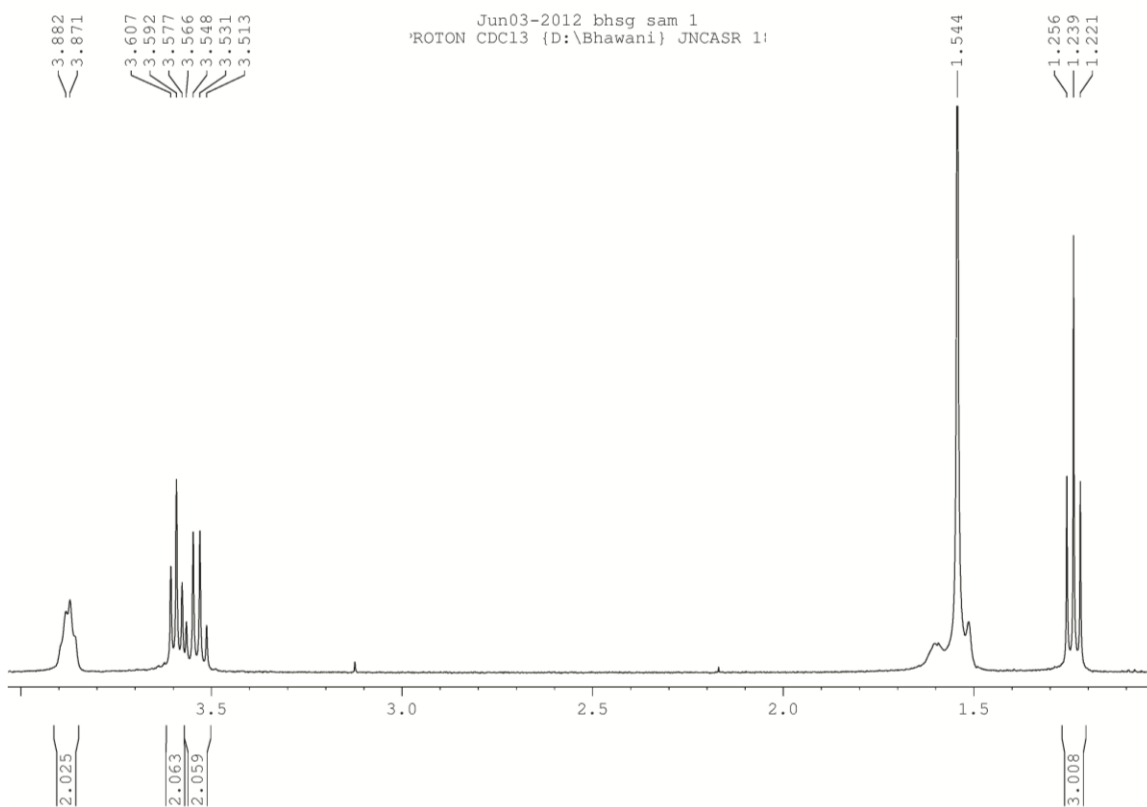

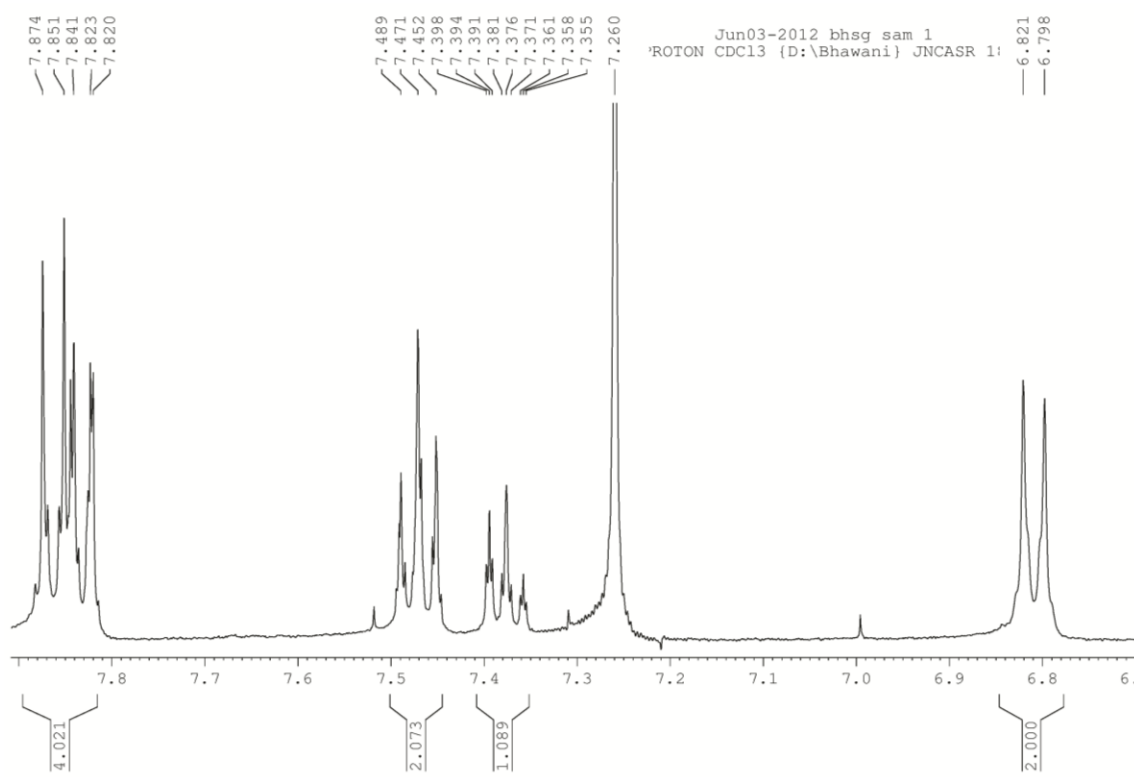

**<sup>13</sup>CNMR**

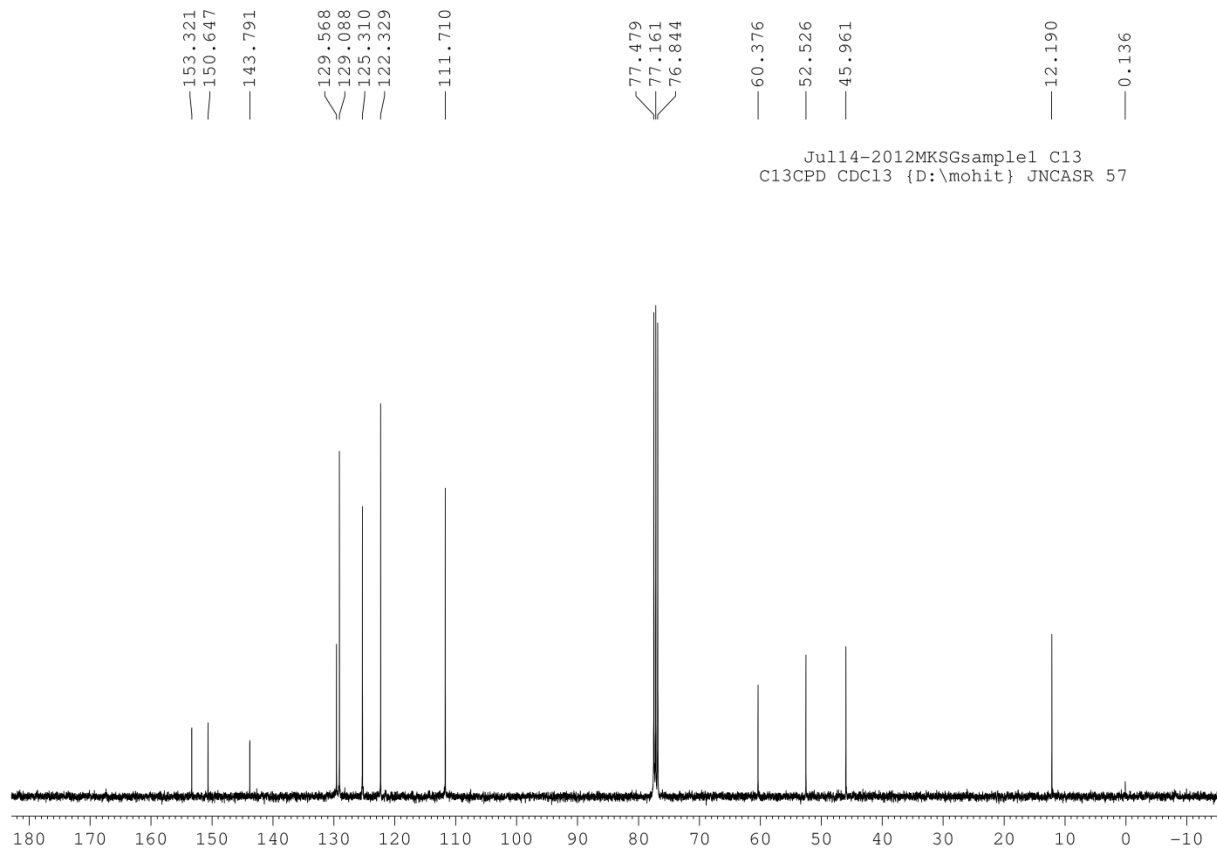

## Mass Spectra

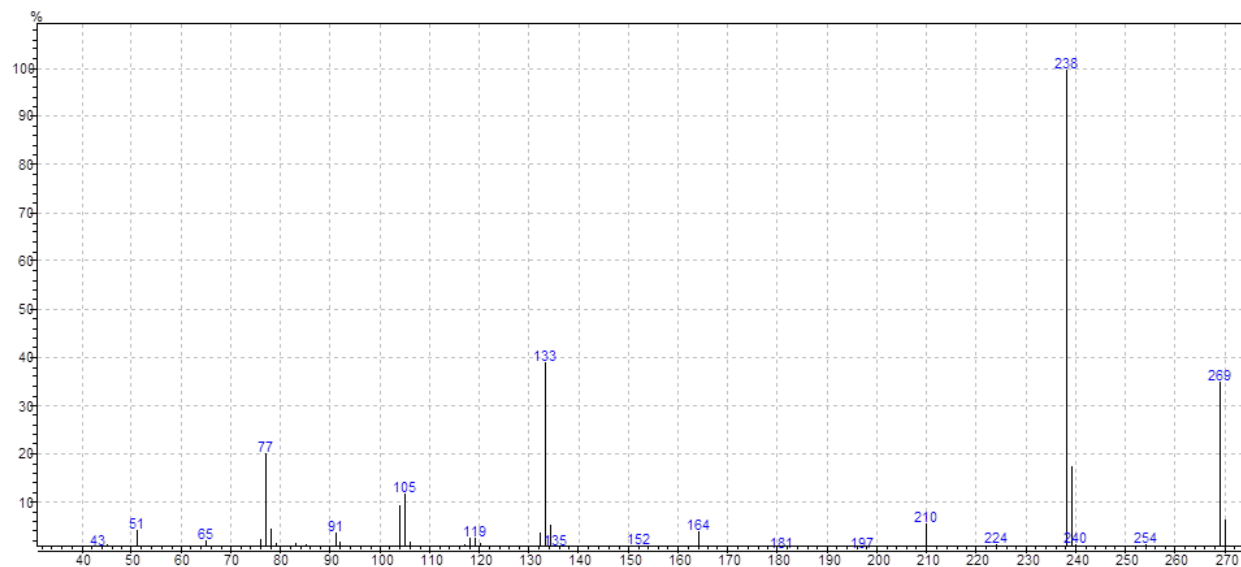

## E4TPA

## <sup>1</sup>H NMR

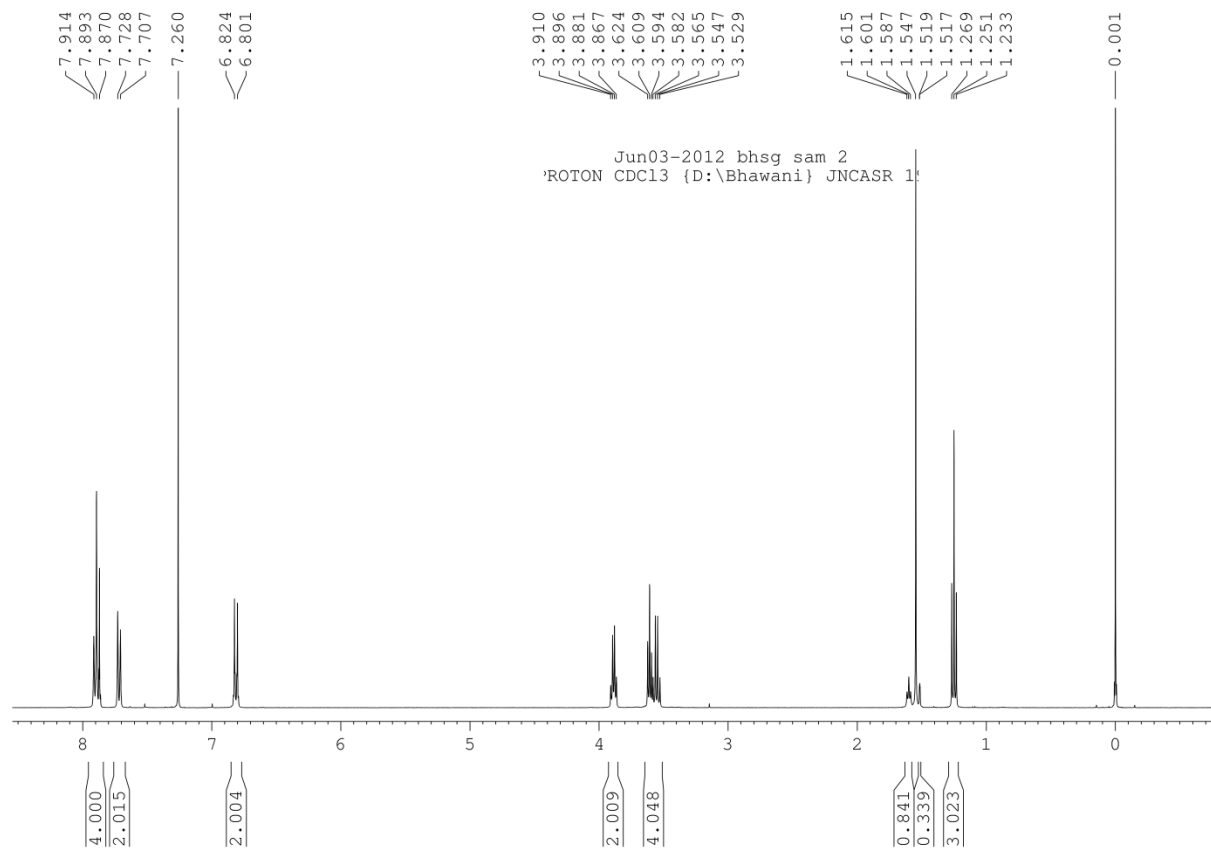

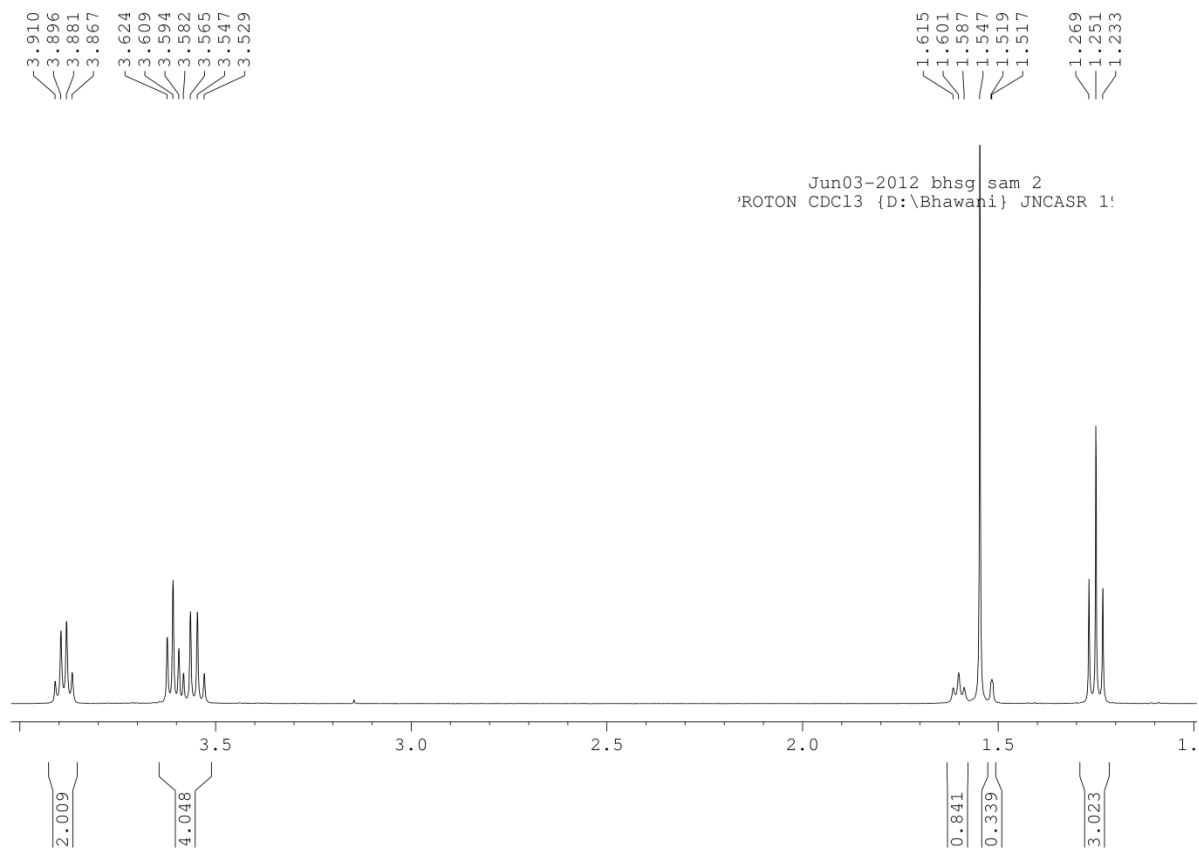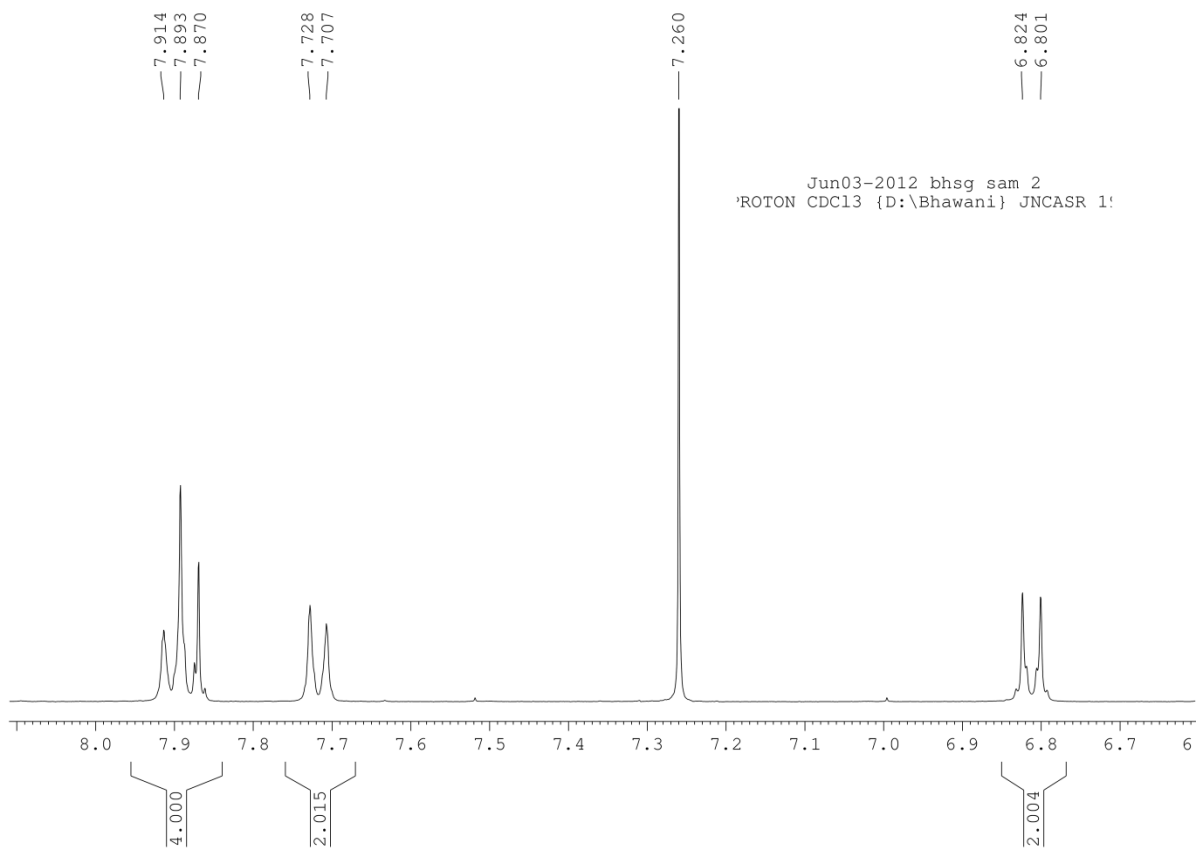

<sup>13</sup>CNMR

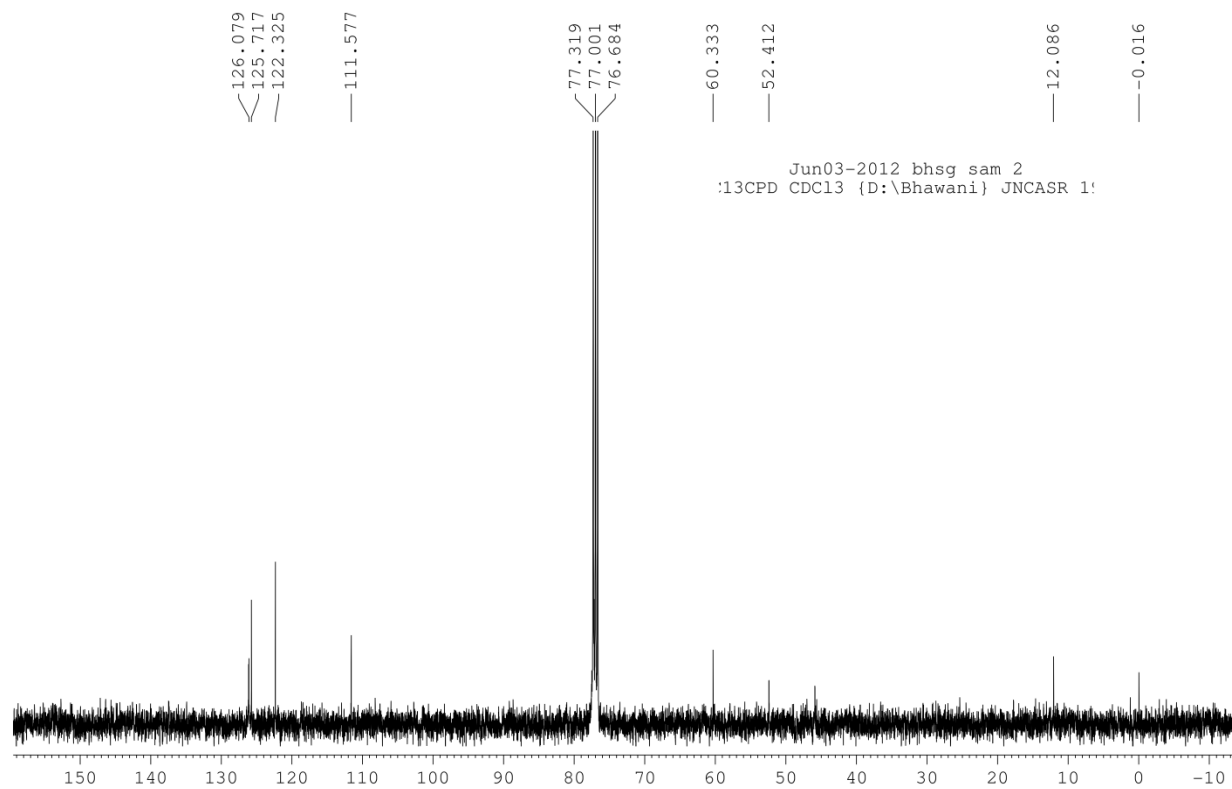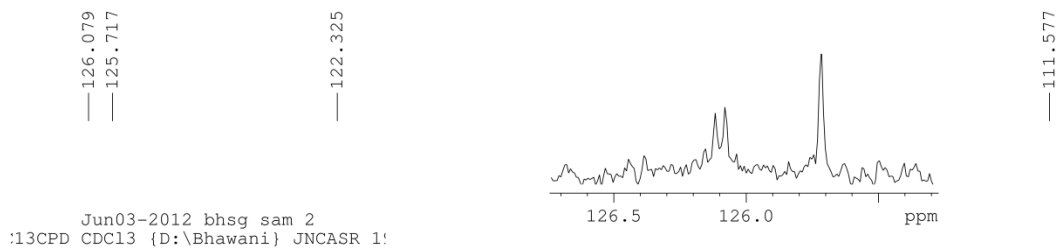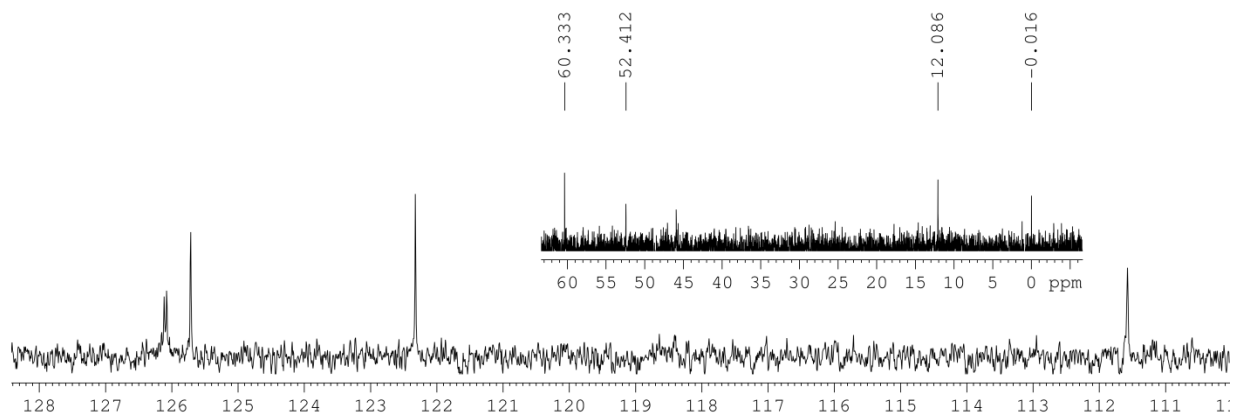

## Mass Spectra

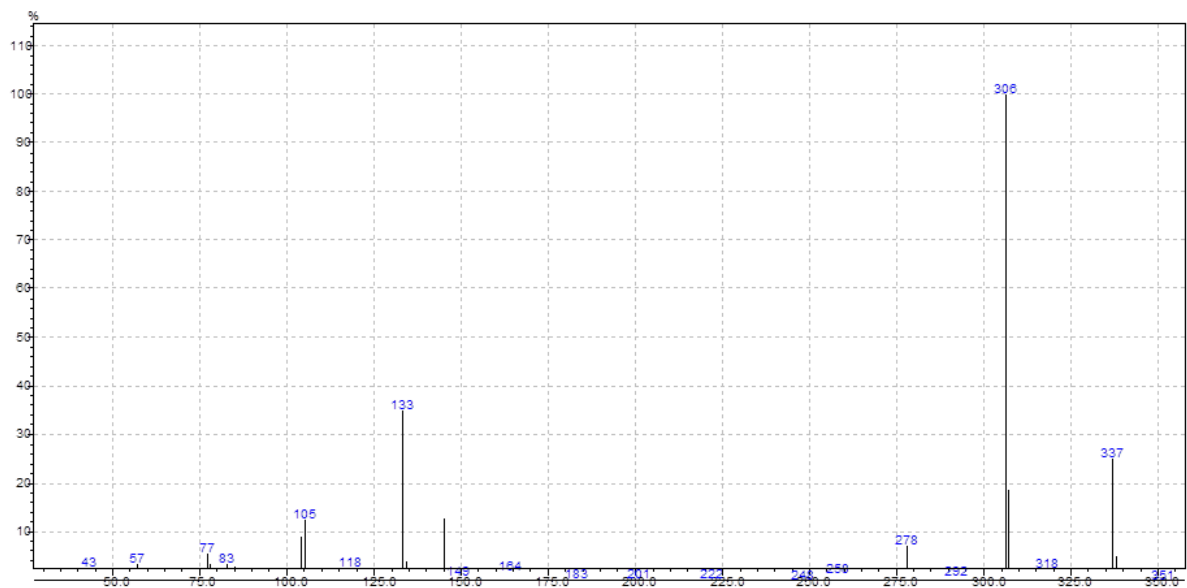

Supplement: c3pp50065a.pdf [file c3pp50065a.pdf]
